# Supplementary material
Source: PubMed Central journal article supplement (PMC5522989)
Supplement: BPH-174-2613-s001.pdf [file BPH-174-2613-s001.pdf]

## Supporting Information

# A critical assessment of the synthesis and biological activity of p53/Hdm2 stapled peptide inhibitors

**Running title:** A critical evaluation of stapled peptides

Rike Wallbrecher<sup>1</sup>, Patrick Chène<sup>2</sup>, Stephan Ruetz<sup>2</sup>, Therese Stachyra<sup>2</sup>, Thomas Vorherr<sup>2</sup>,  
Roland Brock<sup>1\*</sup>

<sup>1</sup>Department of Biochemistry, Radboud Institute for Molecular Life Sciences, Radboud University Medical Center, Geert Grooteplein 28, 6525 GA Nijmegen, The Netherlands

<sup>2</sup>Novartis Institutes for Biomedical Research, 4002 Basel, Switzerland

\*to whom correspondence should be addressed:

Department of Biochemistry, Radboud Institute for Molecular Life Sciences, Radboud University Medical Center, Geert Grooteplein 28, 6525 GA Nijmegen, The Netherlands,  
[roland.brock@radboudumc.nl](mailto:roland.brock@radboudumc.nl)

Ph.: +31-24-3666213

Instrument [BS\_QT03] WSJ-507.08.12

Column: ACQUITY BEH300 C18 2.1x50mm 1.7 um at 80°C:  
Gradient: from 5 to 98 % B in 4.4 min - Flow 0.8 mL/min

Eluent A: water + 0.05% TFA  
Eluent B: acetonitrile + 0.04% TFA

4: UV Detector: TIC

4.328e+1  
Range: 4.328e+1

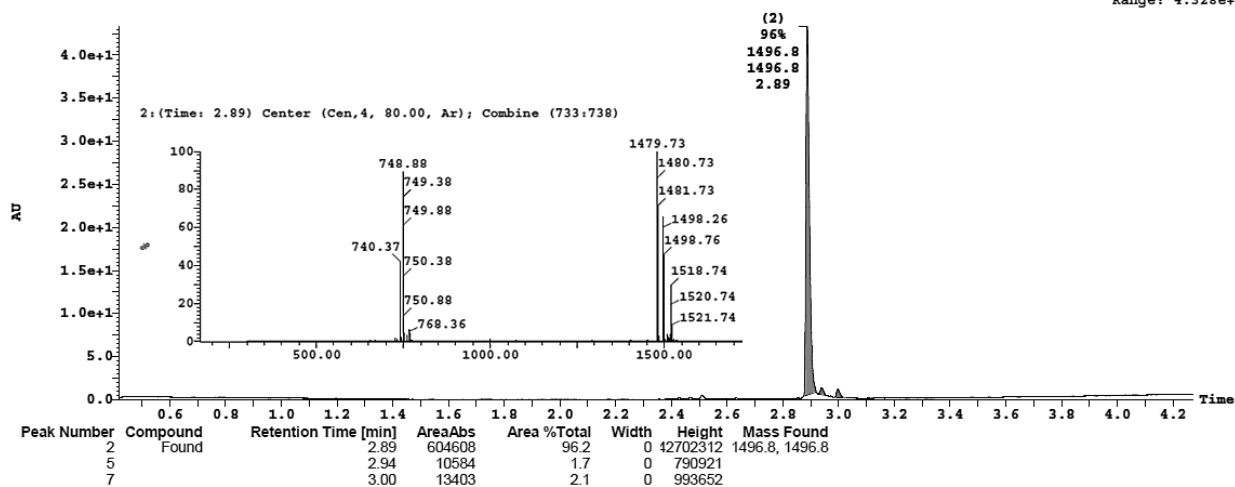

Figure S1: LC-MS of 1a

Instrument [BS\_QT03] WSJ-507.08.12

Column: ACQUITY UPLC CORTECS C18 2.1x100mm 1.6 um at 80°C:  
Gradient: from 5 to 98 % B in 4.4 min - Flow 0.8 mL/min

Eluent A: water + 0.05% TFA  
Eluent B: acetonitrile + 0.04% TFA

4: UV Detector: 214

4.123  
Range: 4.123

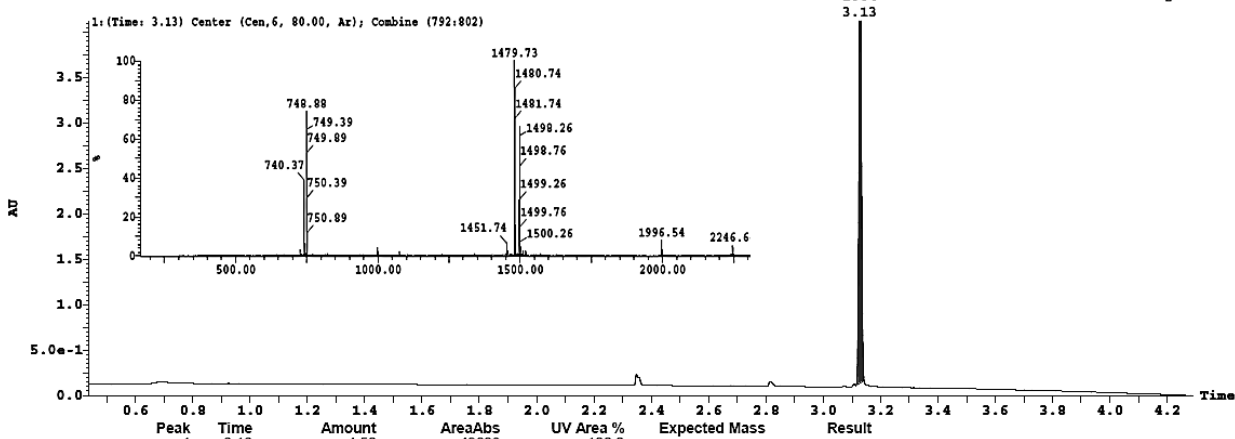

Figure S2: LC-MS of 1b

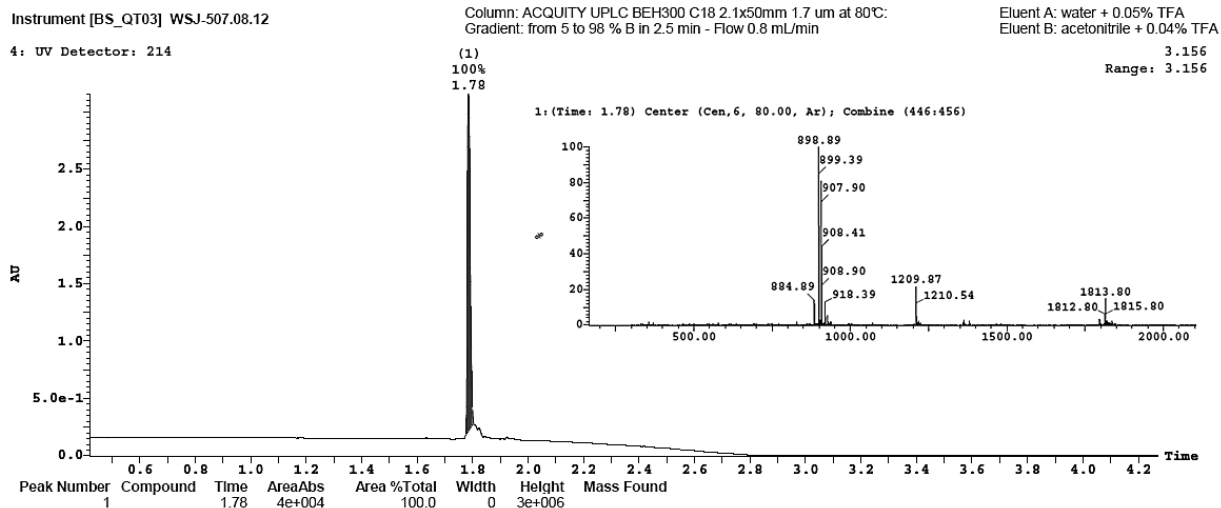

Figure S3: LC-MS of CF1a

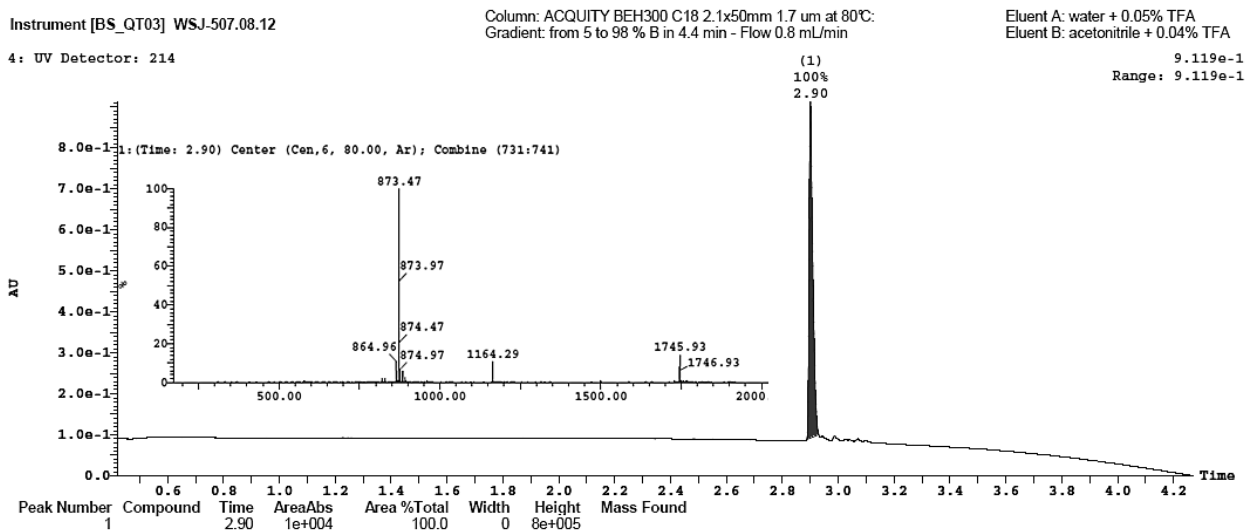

Figure S4: LC-MS of 2a

Instrument [BS\_QT03] WSJ-507.08.12

Column: ACQUITY BEH300 C18 2.1x50mm 1.7 um at 80°C:  
Gradient: from 5 to 98 % B in 4.4 min - Flow 0.8 mL/min

Eluent A: water + 0.05% TFA  
Eluent B: acetonitrile + 0.04% TFA

4: UV Detector: 214

1.943  
Range: 1.943

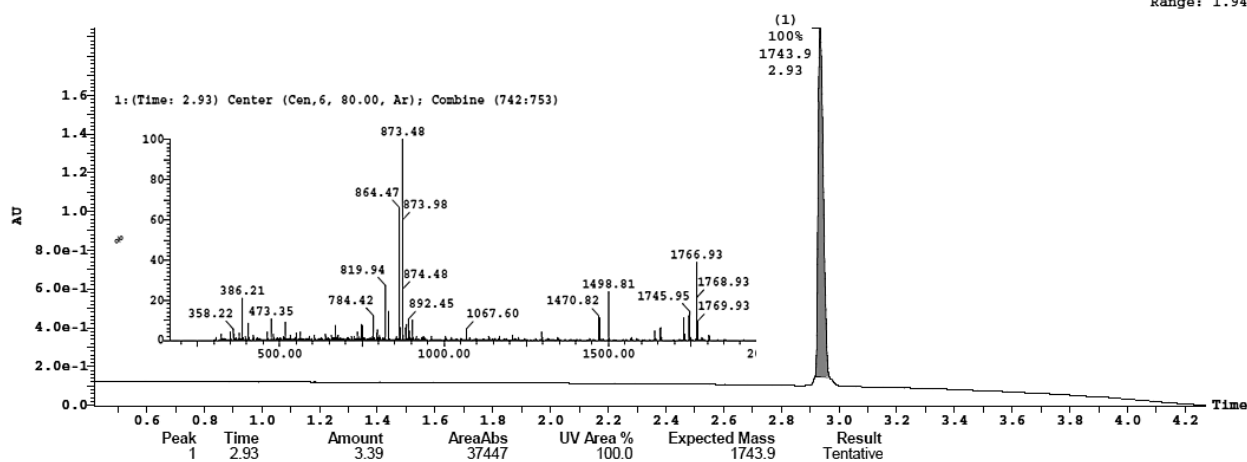

Figure S5: LC-MS of 2b

Instrument [BS\_QT03] WSJ-507.08.12

Column: ACQUITY UPLC CORTECS C18 2.1x100mm 1.6 um at 80°C:  
Gradient: from 5 to 98 % B in 2.5 min - Flow 0.8 mL/min

Eluent A: water + 0.05% TFA  
Eluent B: acetonitrile + 0.04% TFA

4: UV Detector: 214

3.032  
Range: 3.032

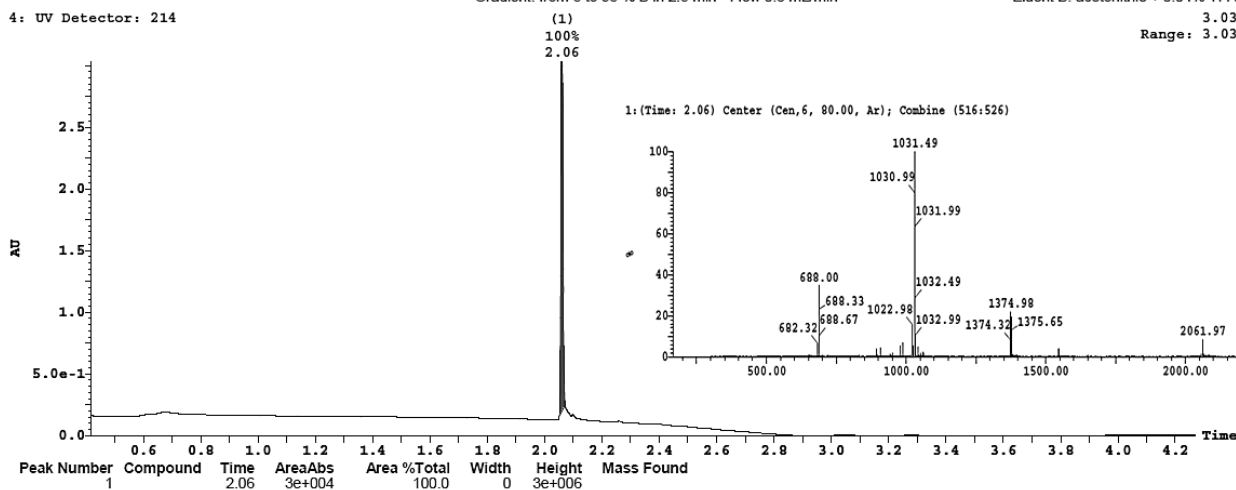

Figure S6: LC-MS of CF2a

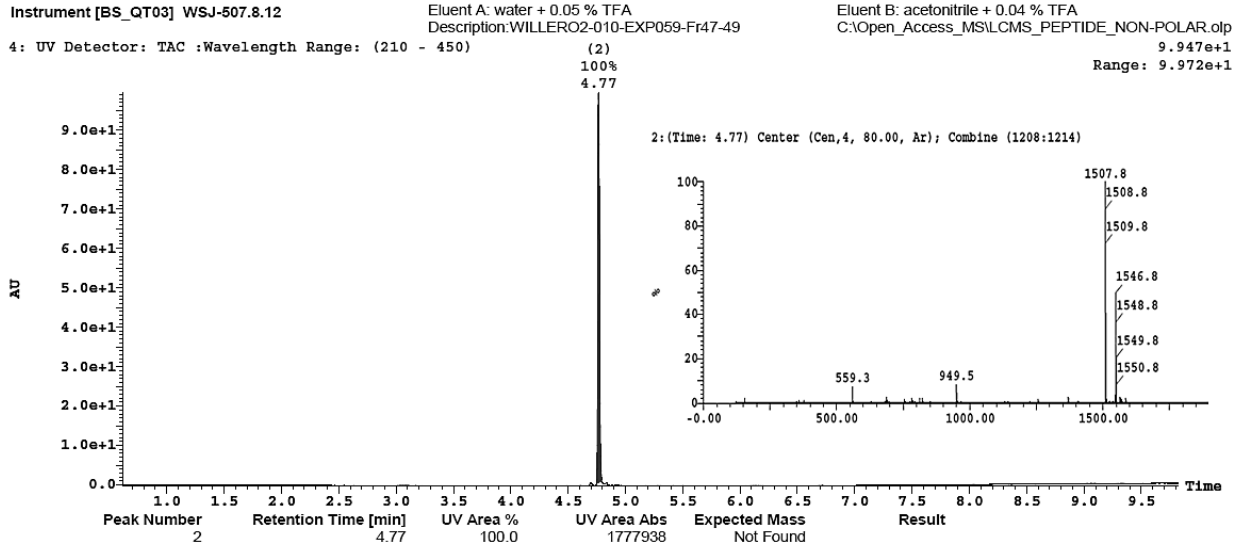

Figure S7: LC-MS of 3

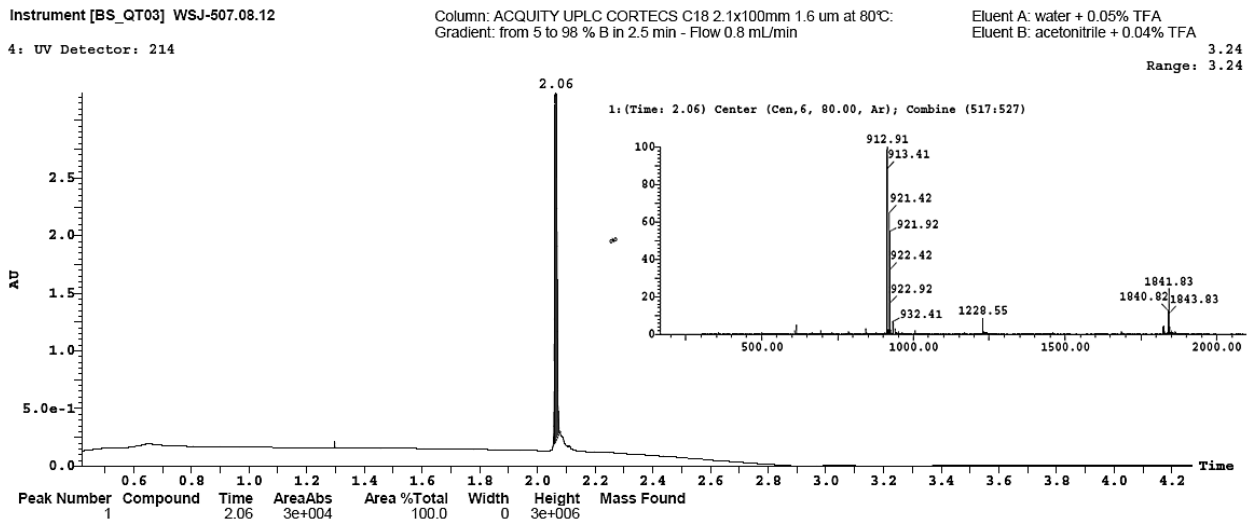

Figure S8: LC-MS of CF3

Instrument [BS\_QT03] WSJ-507.08.12  
4: UV Detector: 214

Column: ACQUITY UPLC CORTECS C18 2.1x100mm 1.6 um at 80°C:  
Gradient: from 5 to 98 % B in 4.4 min - Flow 0.8 mL/min

Eluent A: water + 0.05% TFA  
Eluent B: acetonitrile + 0.04% TFA

2.523  
Range: 2.523

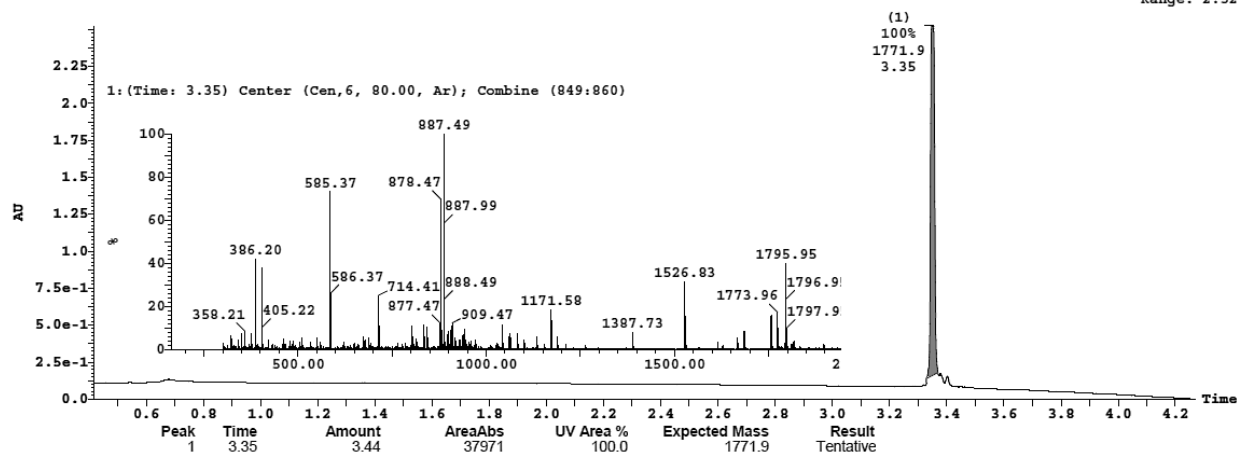

Figure S9: LC-MS of 4

Instrument [BS\_QT03] WSJ-507.08.12  
4: UV Detector: 214

Column: ACQUITY BEH300 C18 2.1x50mm 1.7 um at 80°C:  
Gradient: from 5 to 98 % B in 4.4 min - Flow 0.8 mL/min

Eluent A: water + 0.05% TFA  
Eluent B: acetonitrile + 0.04% TFA

9.065e-1  
Range: 9.065e-1

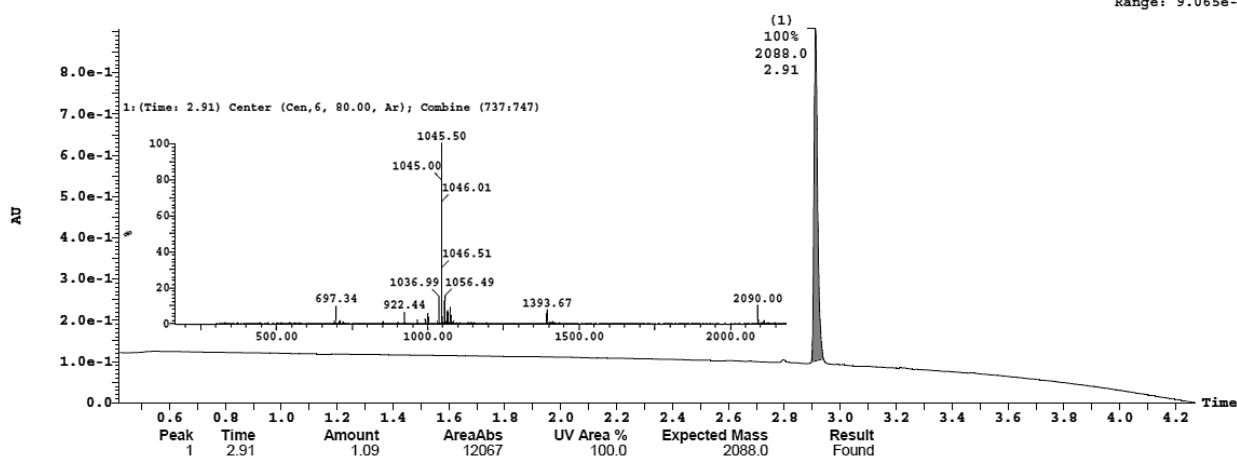

Figure S10: LC-MS of CF4

**Table S1:** Calculated and observed masses for the investigated peptides.

| Compound | Formula                                                            | Calcd. mass                                 | Found mass |
|----------|--------------------------------------------------------------------|---------------------------------------------|------------|
| 1a       | C <sub>75</sub> H <sub>106</sub> CIN <sub>13</sub> O <sub>17</sub> | [M+H] <sup>+</sup> = 1498.2                 | 1498.3     |
| 1b       | C <sub>75</sub> H <sub>106</sub> CIN <sub>13</sub> O <sub>17</sub> | [M+H] <sup>+</sup> = 1498.2                 | 1498.3     |
| CF1a     | C <sub>94</sub> H <sub>114</sub> CIN <sub>13</sub> O <sub>22</sub> | [M+H] <sup>+</sup> = 1814.4                 | 1813.8     |
| 2a       | C <sub>87</sub> H <sub>125</sub> N <sub>17</sub> O <sub>21</sub>   | [M+H] <sup>+</sup> = 1746.0                 | 1745.9     |
| 2b       | C <sub>87</sub> H <sub>125</sub> N <sub>17</sub> O <sub>21</sub>   | [M+H] <sup>+</sup> = 1746.0                 | 1745.9     |
| CF2a     | C <sub>106</sub> H <sub>133</sub> N <sub>17</sub> O <sub>26</sub>  | [M+H] <sup>+</sup> = 2062.3                 | 2062.0     |
| 3        | C <sub>77</sub> H <sub>110</sub> CIN <sub>13</sub> O <sub>17</sub> | [M-H <sub>2</sub> O] <sup>+</sup> = 1507.2* | 1507.8     |
| CF3      | C <sub>96</sub> H <sub>118</sub> CIN <sub>13</sub> O <sub>22</sub> | [M+H] <sup>+</sup> = 1842.5                 | 1841.8     |
| 4        | C <sub>89</sub> H <sub>129</sub> N <sub>17</sub> O <sub>21</sub>   | [M+H] <sup>+</sup> = 1774.1                 | 1774.0     |
| CF4      | C <sub>108</sub> H <sub>137</sub> N <sub>17</sub> O <sub>26</sub>  | [M+H] <sup>+</sup> = 2090.3                 | 2090.0     |

\*Loss of water is attributed to the ionization process during MS analysis.

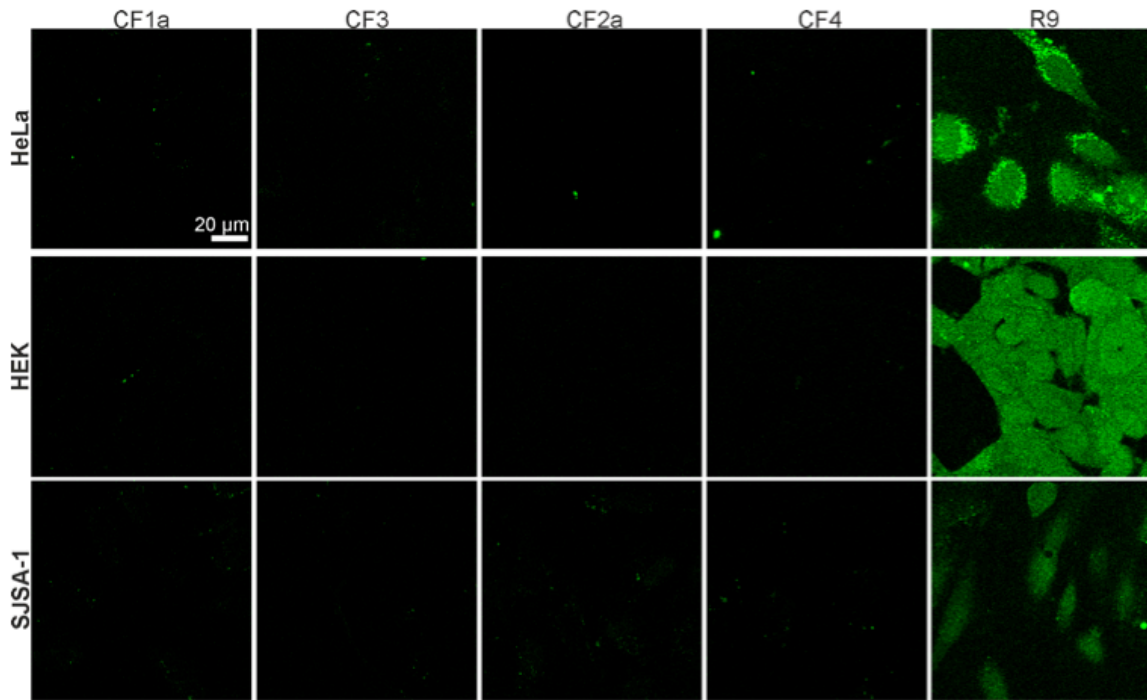

**Figure S11:** Intracellular distribution of stapled peptides after a 30 min incubation. Cells were incubated with 5  $\mu\text{M}$  of the peptides in RPMI + 10 % FCS, washed and confocal images were recorded. Fluorescein-labeled R9 was used as a reference. Scale bar denotes 20  $\mu\text{m}$ . The figure shows one representative experiment of two independent repetitions.

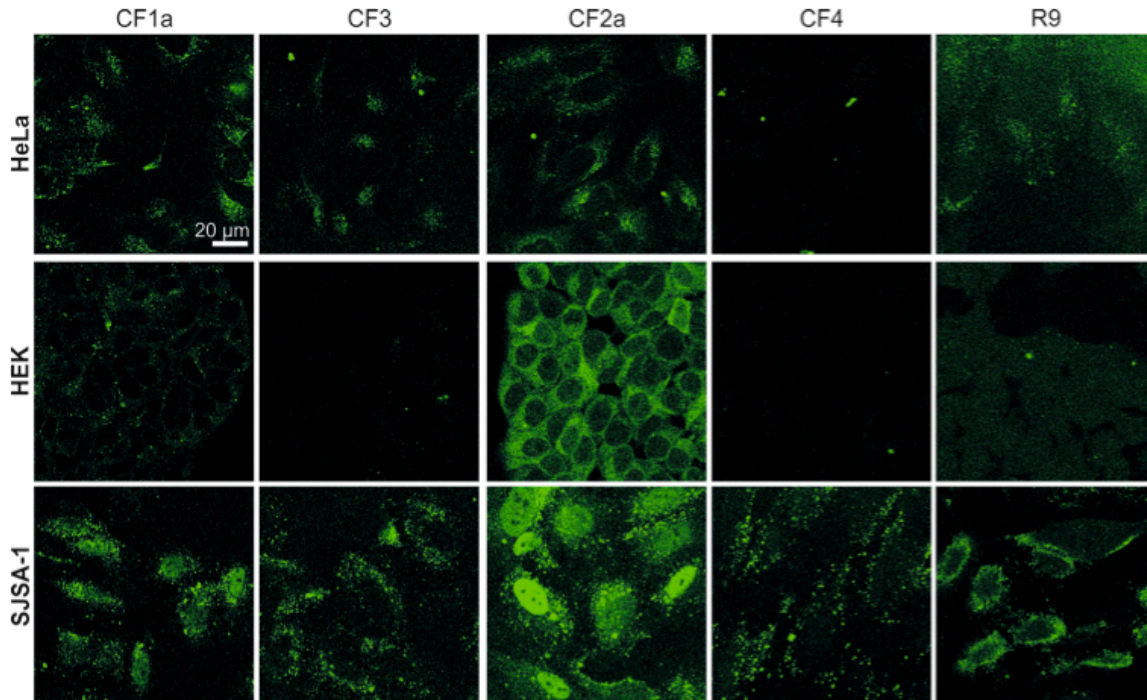

**Figure S12:** Intracellular distribution of stapled peptides after a 24 h incubation. Cells were incubated with 5  $\mu\text{M}$  of the CF-labeled peptides in RPMI + 10 % FCS, washed and confocal images were recorded. R9 was used as a control CPP. The bars indicate the size. In



comparison to 20  $\mu\text{M}$ , different contrast settings were used to improve visualization. The figure shows one representative experiments of three independent repetitions.

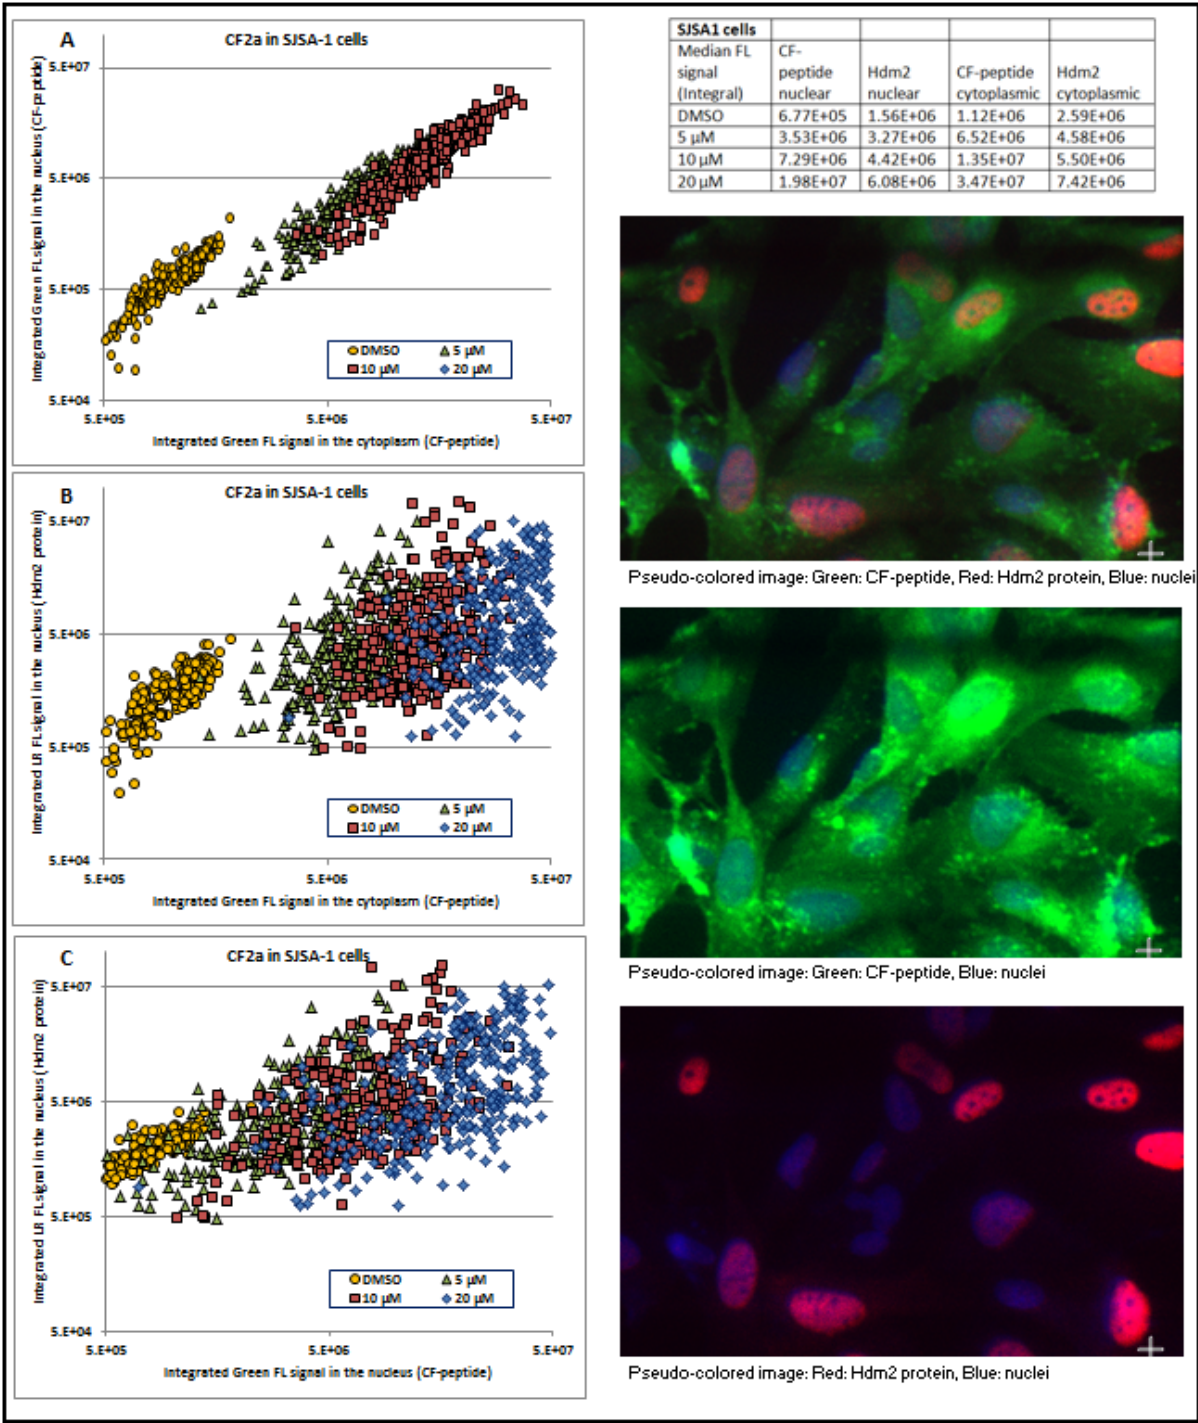

**Figure S13:** Colocalization of CF2a and Hdm2 in SJS1-1 cells. After treatment of cells with the carboxyfluorescein-labeled peptide at the indicated concentrations or DMSO control, cells were fixed, stained for detection of nuclei using DAPI and for Hdm2 using immunofluorescence and imaged by multi-channel fluorescence microscopy (right panels). (A) Correlation of integrated fluorescein fluorescence in the nucleus and cytoplasm. (B, C)

Correlation of integrated Hdm2 fluorescence in the nucleus versus carboxyfluorescein fluorescence in the cytoplasm (B) and in the nucleus (C).

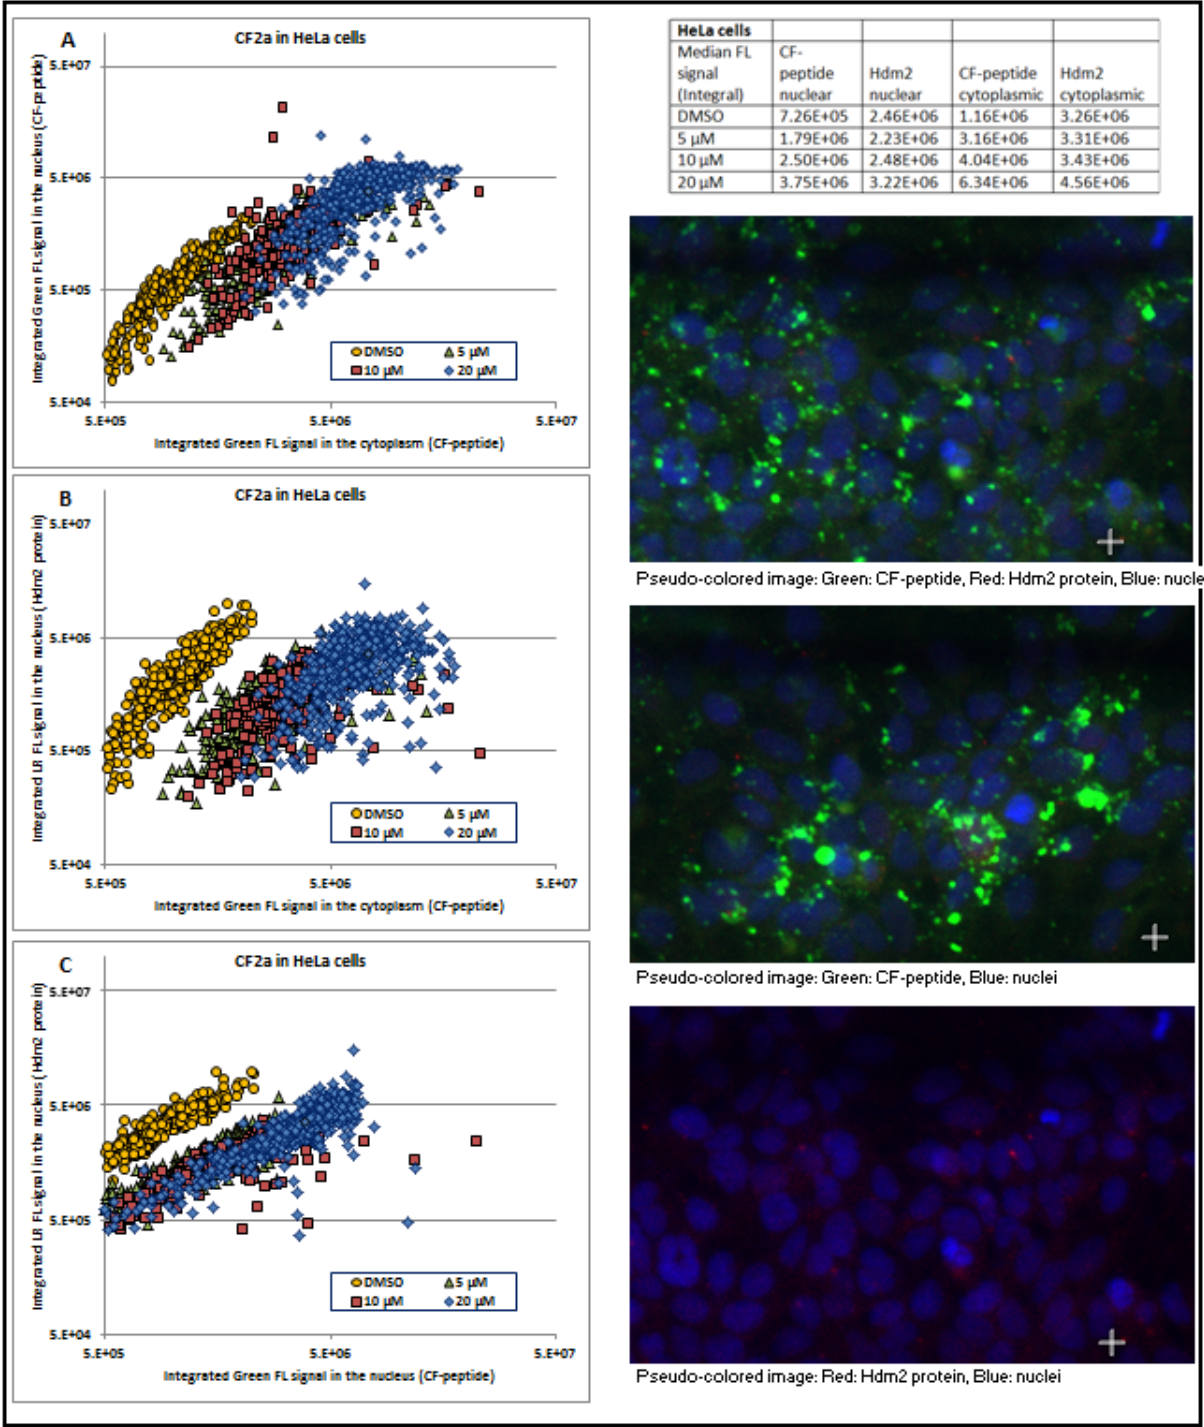

**Figure S14:** Colocalization of CF2a and Hdm2 in HeLa cells. After treatment of cells with the carboxyfluorescein-labeled peptide at the indicated concentrations or DMSO control, cells were fixed, stained for detection of nuclei using DAPI and for Hdm2 using immunofluorescence and imaged by multi-channel fluorescence microscopy (right panels). (A) Correlation of integrated fluorescein fluorescence in the nucleus and cytoplasm. (B, C)

Correlation of integrated Hdm2 fluorescence in the nucleus versus carboxyfluorescein fluorescence in the cytoplasm (B) and in the nucleus (C).

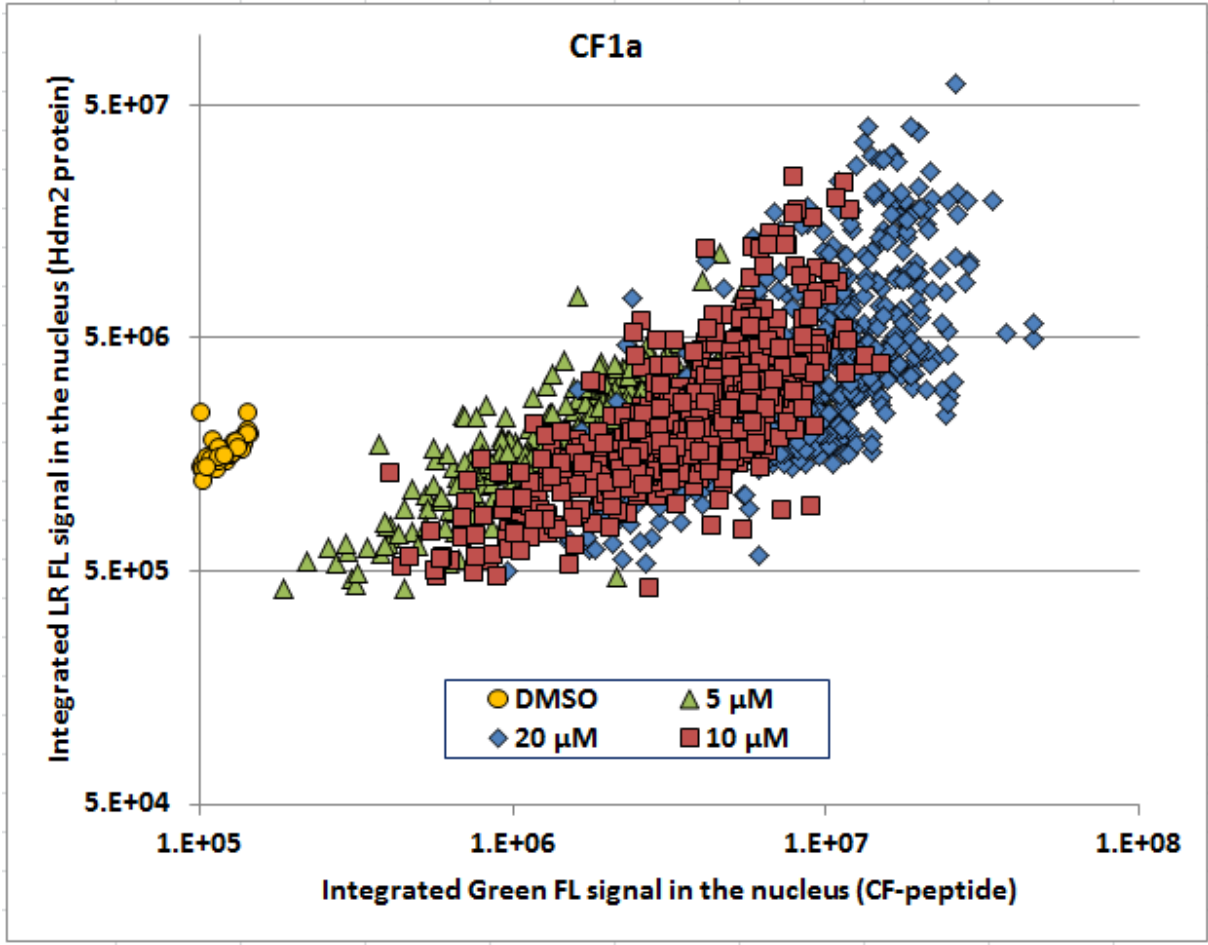

**Figure S15:** Co-localization of the labeled peptide CF1a with the PD marker Hdm2. After treatment of SJSA1 cells for 24 h with the carboxyfluorescein-labeled peptide at the indicated concentrations, the cells were fixed and stained with a specific antibody against the PD marker Hdm2 linked with a red fluorescent label.
